# Supplementary material
Source: HighWire-hosted journal article supplement (http://rc.rcjournal.com/highwire/filestream/11976/field_highwire_adjunct_files/0/RC-02732.R1_LELLOUCHE_Suppl.pdf)
Supplement: RC-02732.R1_LELLOUCHE_Suppl.pdf [file RC-02732.R1_LELLOUCHE_Suppl.pdf]

**Comparison of usual and alternative methods to measure patient's height in mechanically ventilated patients: potential impact on protective ventilation**

Bojmehrani A, Bergeron-Duchesne M, Bouchard C, Simard S, Bouchard PA, Vanderschuren A, L'Her E, Lellouche F.

Online supplement

**Additional Methods:**

The following equations and table were used in the study:

Predicted body weight equations:

$$\text{PBW (kg)} = 50 + (0.91 * \text{height (cm)} - 152.4) \text{ for men}$$

$$\text{PBW (kg)} = 45.5 + (0.91 * \text{height (cm)} - 152.4) \text{ for women}$$

From the reference (1)

Chumlea equations:

$$64.19 - (0.04 * \text{age}) + (0.02 * \text{lower leg size (cm)}) \text{ for men}$$

$$84.88 - (0.24 * \text{age}) + (1.83 * \text{lower leg size (cm)}) \text{ for women}$$

From the reference (26)

ONLINE DATA SUPPLEMENT

|                         | <b>Height (m)</b> |             |           |             |           |             |           |             |           |             |           |             |           |             |
|-------------------------|-------------------|-------------|-----------|-------------|-----------|-------------|-----------|-------------|-----------|-------------|-----------|-------------|-----------|-------------|
| Men (<65 years)         | 1.94              | 1.93        | 1.91      | 1.89        | 1.87      | 1.85        | 1.84      | 1.82        | 1.80      | 1.78        | 1.76      | 1.75        | 1.73      | 1.71        |
| Men (≥65 years)         | 1.87              | 1.86        | 1.84      | 1.82        | 1.81      | 1.79        | 1.78      | 1.76        | 1.75      | 1.73        | 1.71      | 1.70        | 1.68      | 1.67        |
| <b>Ulna length (cm)</b> | <b>32</b>         | <b>31.5</b> | <b>31</b> | <b>30.5</b> | <b>30</b> | <b>29.5</b> | <b>29</b> | <b>28.5</b> | <b>28</b> | <b>27.5</b> | <b>27</b> | <b>26.5</b> | <b>26</b> | <b>25.5</b> |
| Women (<65 years)       | 1.84              | 1.83        | 1.81      | 1.80        | 1.79      | 1.77        | 1.76      | 1.75        | 1.73      | 1.72        | 1.70      | 1.69        | 1.68      | 1.66        |
| Women (≥65 years)       | 1.84              | 1.83        | 1.81      | 1.79        | 1.78      | 1.76        | 1.75      | 1.73        | 1.71      | 1.70        | 1.68      | 1.66        | 1.65      | 1.63        |
| Men (<65 years)         | 1.69              | 1.67        | 1.66      | 1.64        | 1.62      | 1.60        | 1.58      | 1.57        | 1.55      | 1.53        | 1.51      | 1.49        | 1.48      | 1.46        |
| Men (≥65 years)         | 1.65              | 1.63        | 1.62      | 1.60        | 1.59      | 1.57        | 1.56      | 1.54        | 1.52      | 1.51        | 1.49      | 1.48        | 1.46      | 1.45        |
| <b>Ulna length (cm)</b> | <b>25</b>         | <b>24.5</b> | <b>24</b> | <b>23.5</b> | <b>23</b> | <b>22.5</b> | <b>22</b> | <b>21.5</b> | <b>21</b> | <b>20.5</b> | <b>20</b> | <b>19.5</b> | <b>19</b> | <b>18.5</b> |
| Women (<65 years)       | 1.65              | 1.63        | 1.62      | 1.61        | 1.59      | 1.58        | 1.56      | 1.55        | 1.54      | 1.52        | 1.51      | 1.50        | 1.48      | 1.47        |
| Women (≥65 years)       | 1.61              | 1.60        | 1.58      | 1.56        | 1.55      | 1.53        | 1.52      | 1.50        | 1.48      | 1.47        | 1.45      | 1.44        | 1.42      | 1.40        |

Measure between the point of the elbow (olecranon process) and the midpoint of the prominent bone of the wrist (styloid process). From the reference (27)

**Figure Legends (online supplement)**

**Figure E1: Theoretical impact of the height measurement error on the protective ventilation implementation in male (upper panel) and in female (lower panel).** Tidal volume really delivered (ml/kg of PBW) with a target tidal volume of 6 ml/kg PBW for different errors on height measurements and for different heights.

Abbreviations: PBW: predicted body weight

**Figure E2: The error of the visual estimation were inversely proportional to the patient's height.** *Solid lines* represents linear regression. Correlation coefficient:  $r=0.52$ ,  $P<0.0001$ .

## Additional Table

|                                                          | Patients with<br>height > 167 cm<br>(n=49) | Patients with<br>height ≤ 167 cm<br>(n=51) |
|----------------------------------------------------------|--------------------------------------------|--------------------------------------------|
| Female gender, n (%)                                     | 2 (4.1)                                    | 23 (45.0)                                  |
| Age (year)                                               | <b>Min;Max</b><br>31; 80                   | <b>Min;Max</b><br>50; 89                   |
| BMI (kg/m <sup>2</sup> )                                 | 21.1; 49.1                                 | 20.8; 35.5                                 |
| <b>Height (cm)</b>                                       |                                            |                                            |
| <b>Based on height gauge (reference)</b>                 | <b>168; 188</b>                            | <b>149; 167</b>                            |
| Based on lower leg                                       | 165; 185                                   | 145; 176                                   |
| Based on forearm                                         | 155; 182                                   | 148; 175                                   |
| Based on visual estimation                               | 156; 183                                   | 152; 180                                   |
| Based on measuring tape                                  | 163; 188                                   | 150; 177                                   |
| <b>Weigh (kg)</b>                                        |                                            |                                            |
| Actual weight (Kg)                                       | 61.0; 146.2                                | 41.0; 107.7                                |
| <b>PBW based on height gauge (reference)</b>             | <b>61.5; 82.4</b>                          | <b>42.4; 63.3</b>                          |
| PBW based on lower leg                                   | 57.7; 79.6                                 | 39.3; 71.5                                 |
| PBW based on forearm                                     | 47.9; 76.9                                 | 41.5; 70.6                                 |
| PBW based on visual estimation                           | 53.3; 77.8                                 | 45.1; 73.3                                 |
| PBW based on measuring tape                              | 59.6; 82.4                                 | 43.3; 72.8                                 |
| <b>Tidal volume 8 ml/kg (ml)</b>                         |                                            |                                            |
| TV based on actual weight                                | 488; 1170                                  | 328; 861                                   |
| <b>TV based on height gauge (reference)</b>              | <b>492; 659</b>                            | <b>339; 506</b>                            |
| TV based on lower leg                                    | 461; 637                                   | 314; 572                                   |
| TV based on forearm                                      | 383; 615                                   | 332; 565                                   |
| TV based on visual estimation                            | 426; 623                                   | 361; 586                                   |
| TV based on measuring tape                               | 477; 659                                   | 347; 583                                   |
| <b>Error on tidal volume compared to reference (ml)*</b> |                                            |                                            |
| Δ TV based on actual weight                              | -623; 80                                   | -394; 33                                   |
| Δ TV based on lower leg                                  | -87; 67                                    | -82; 82                                    |
| Δ TV based on forearm                                    | -73; 146                                   | -73; 15                                    |
| Δ TV based on visual estimation                          | -73; 102                                   | -149; 347                                  |
| Δ TV based on measuring tape                             | -124; 58                                   | -138; 36                                   |

**Table E1: Impact of the method of height measurement on tidal volume setting. Minimal and maximal values are reported in this table.**

\*The error was calculated for a target of 8 ml/kg with the following formula: tidal volume with height reference – tidal volume with other methods. Negative values correspond to overestimation of the tidal volume.

Abbreviations: BMI: body mass index; PBW: predicted body weight; TV: tidal volume

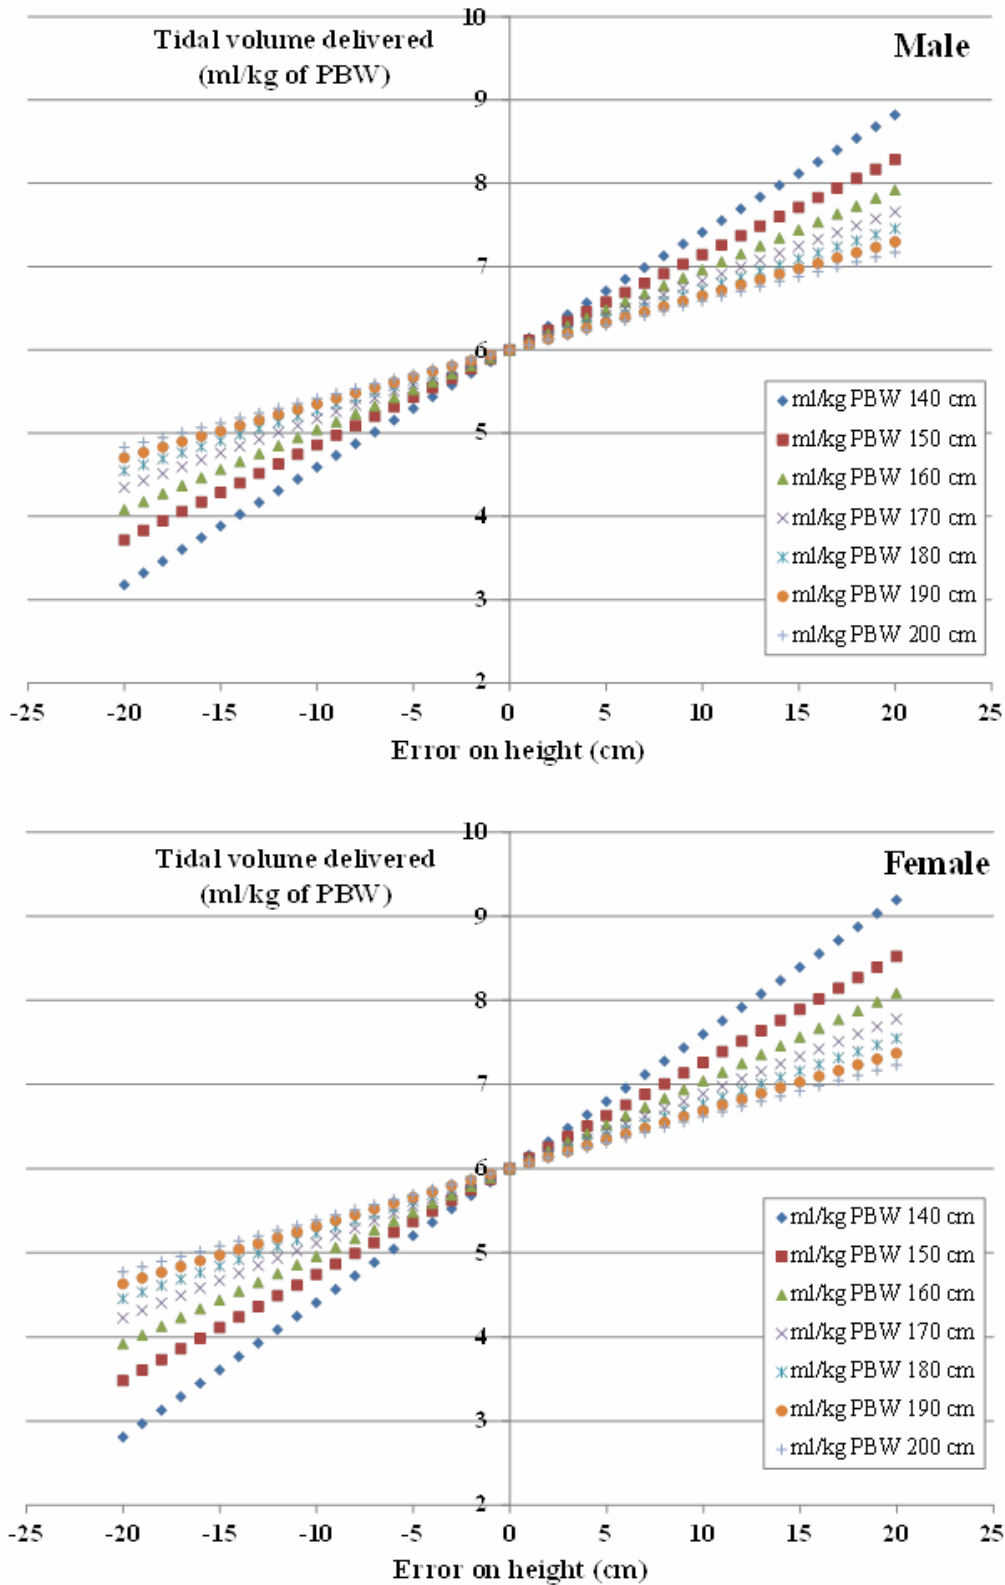

Figure E1: Theoretical impact of the height measurement error on the protective ventilation implementation in male (upper panel) and in female (lower panel).

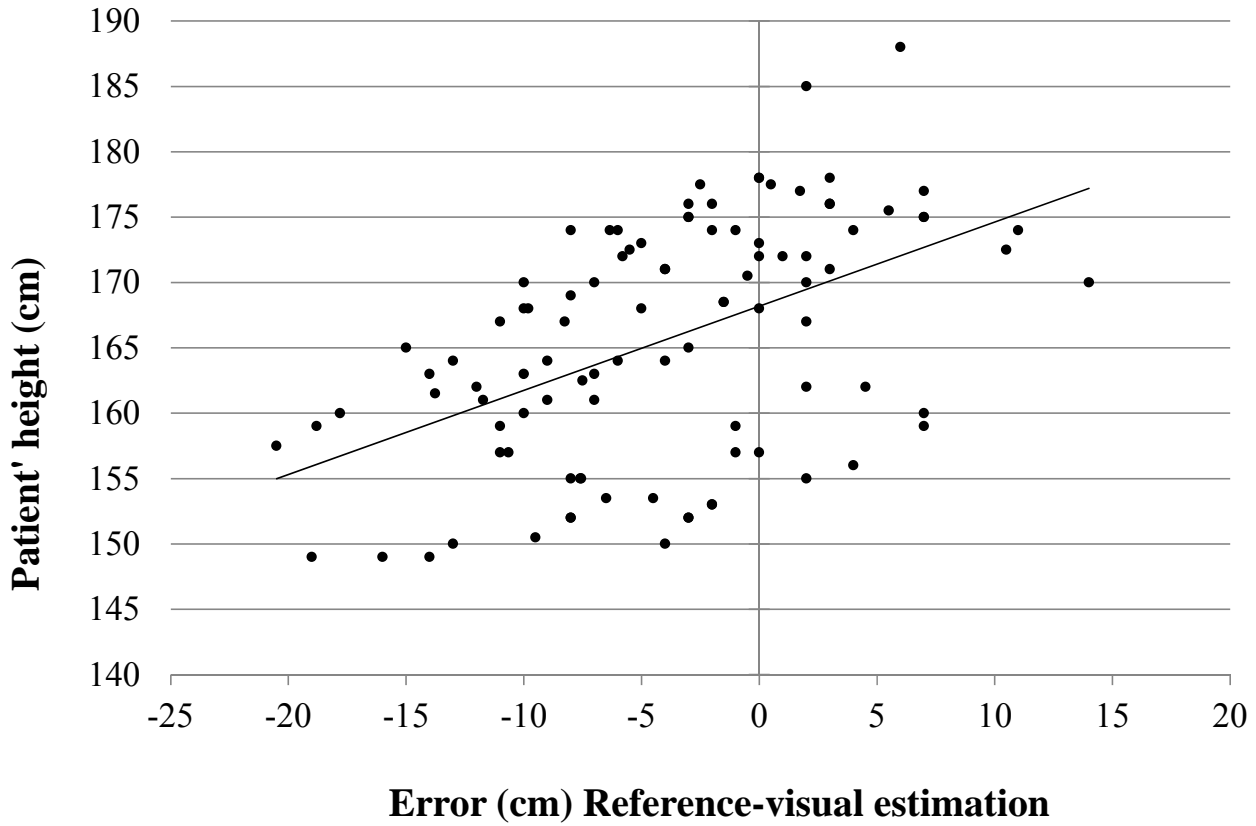

**Figure E2: The error of the visual estimation were inversely proportional to the patient's height.** *Solid lines* represents linear regression. Correlation coefficient:  $r=0.52$ ,  $P<0.0001$ .
